# Supplementary material
Source: publisher site journal article supplement (https://www.dovepress.com/article/253125)
Supplement: Supplementary file 1 [file get_supplementary_file.php]

---

## Procedures for liver transplantation of SD rats

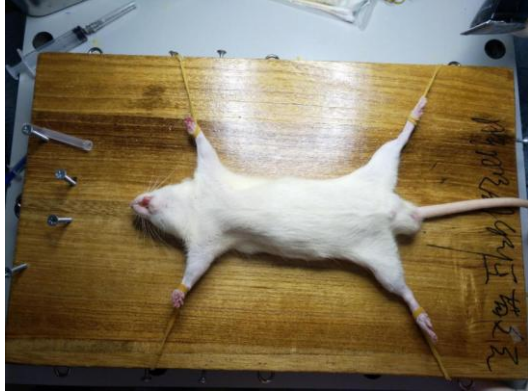

1. The donor rat

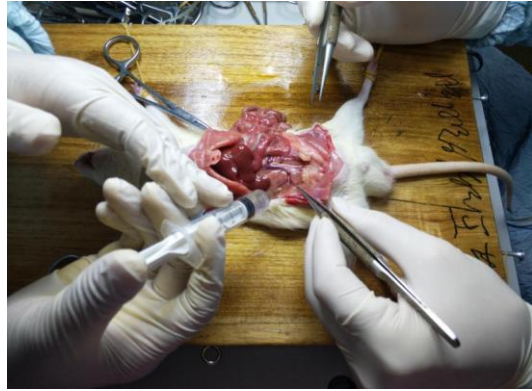

4. Heparinization via lumbar vein

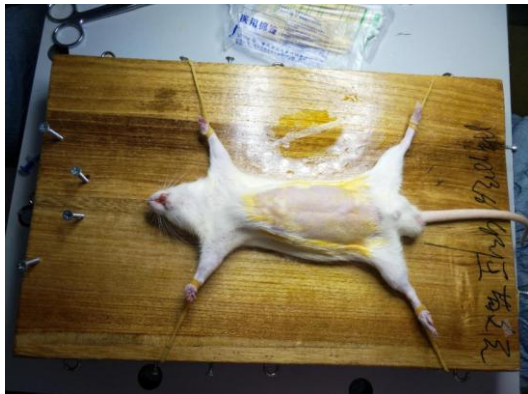

2. Anaesthetic and disinfection

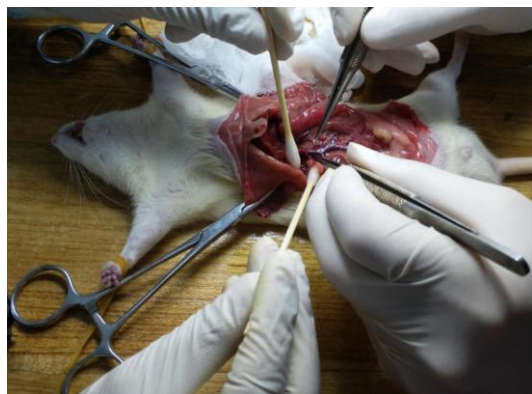

5. Free hepatic portal vein and inferior vena cava

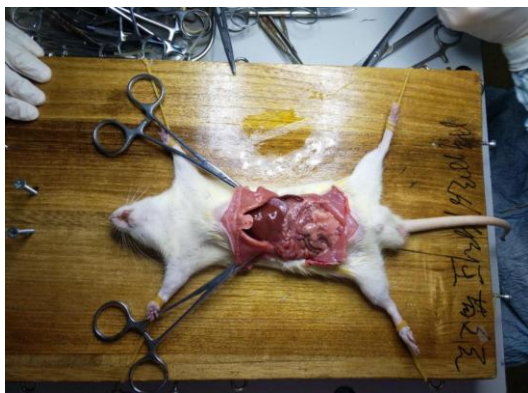

3. Cross incision open abdominal cavity

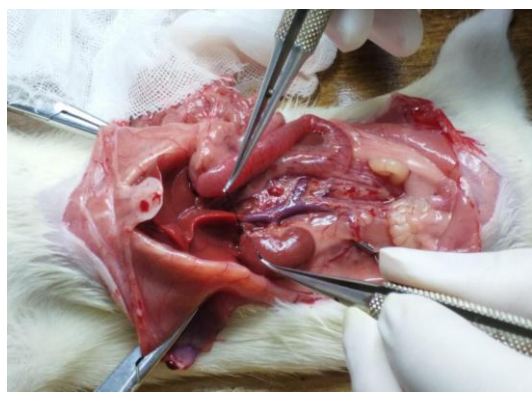

6. Ligate right adrenal vein and left renal vein in turn

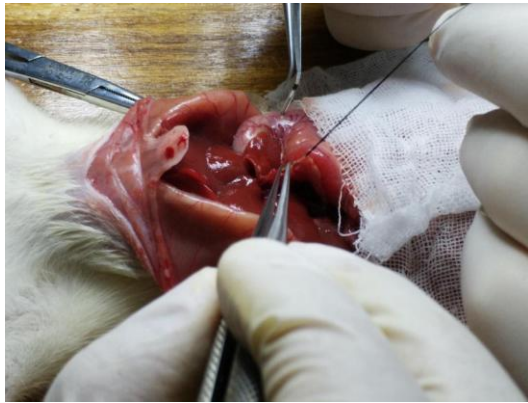

7. Free common bile duct and intubate

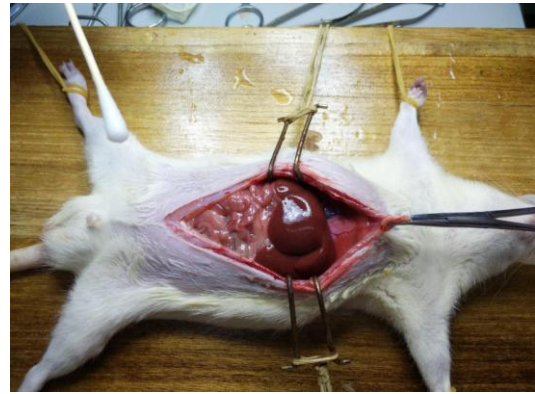

10. Exposure of rat liver through abdominal median incision

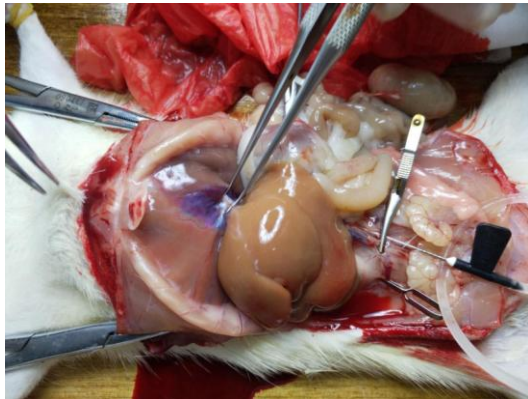

8. Blocking thoracic aorta, perfusing normal saline through abdominal aorta, and discharging blood in liver

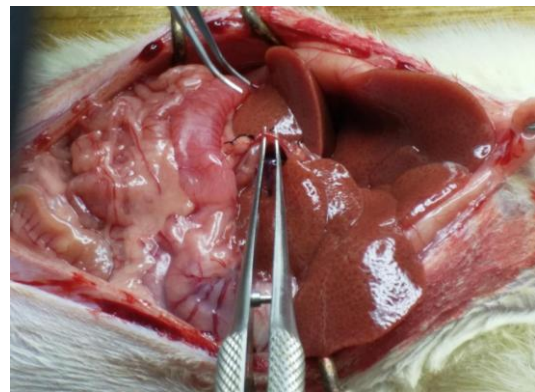

11. Ligation of common bile duct

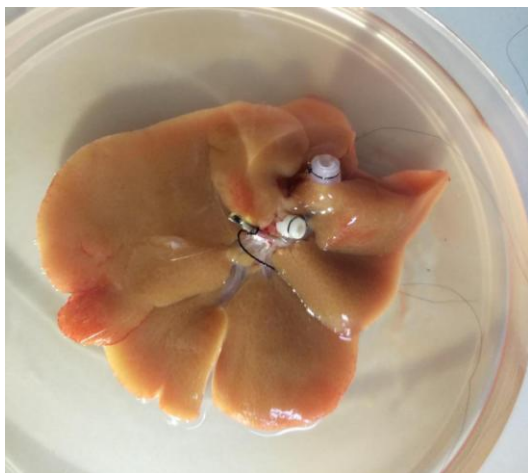

9. Take the donor liver and cannulate in portal vein and inferior vena cava

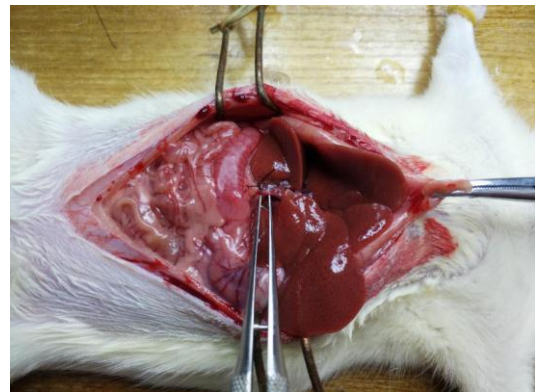

12. Free and ligation of hepatic artery

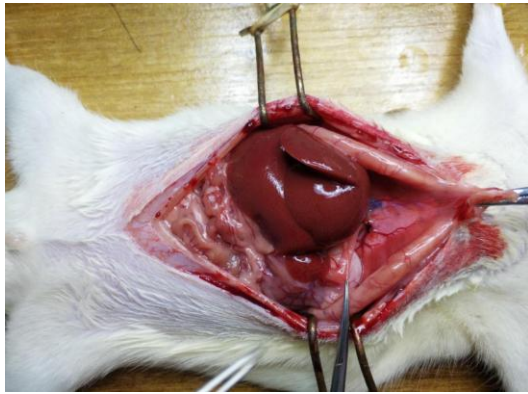

13. Ligation of right adrenal vein, left diaphragmatic vein and hepatic esophageal vein

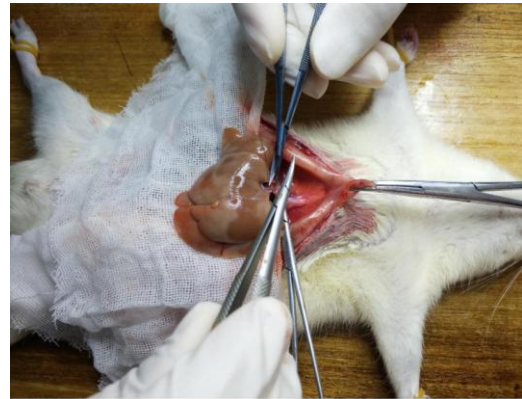

16. The recipient underwent liver transplantation and sutured the superior vena cava

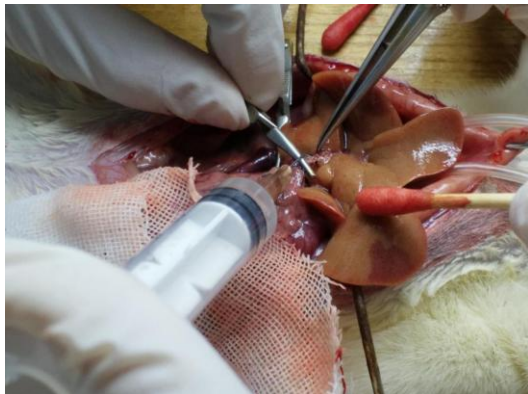

14. Blocking portal vein and perfusing normal saline through portal vein

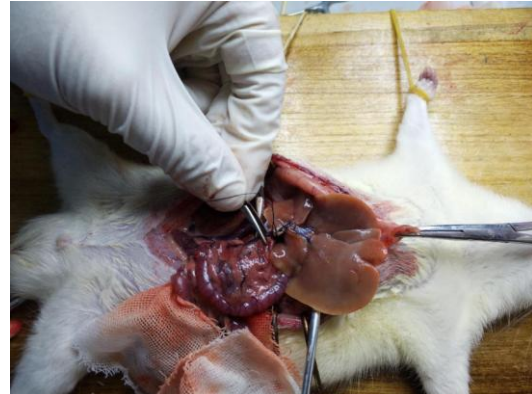

17. After portal vein anastomosis, portal vein was opened and liver blood was re-perfused

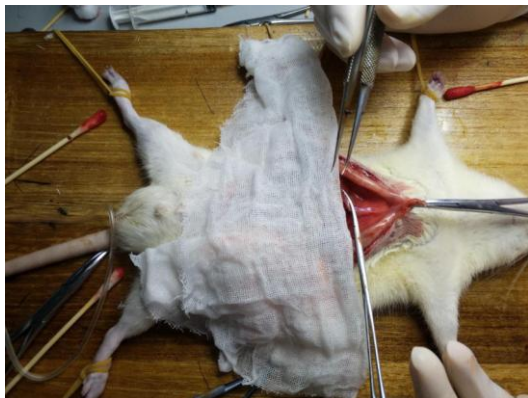

15. Blocking superior and inferior vena cava of liver and removing liver of recipient rats

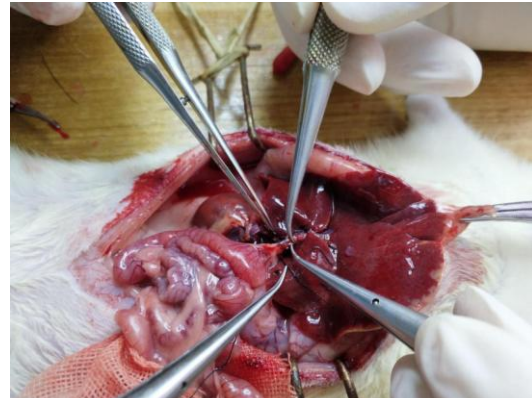

18. Common bile duct anastomosis

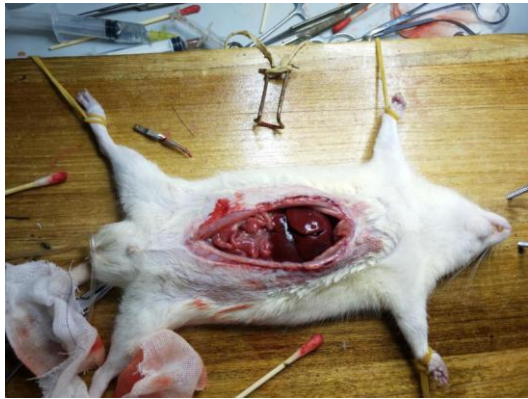

19. Intestinal tract reset, ready to close abdomen

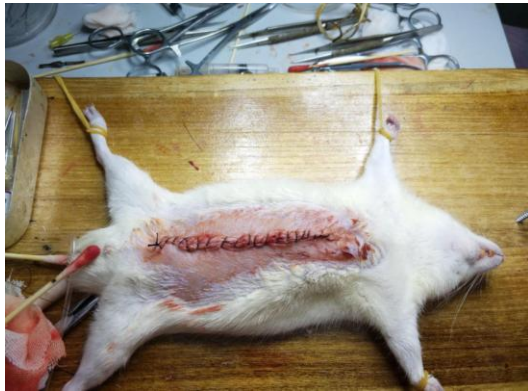

20. Suture skin

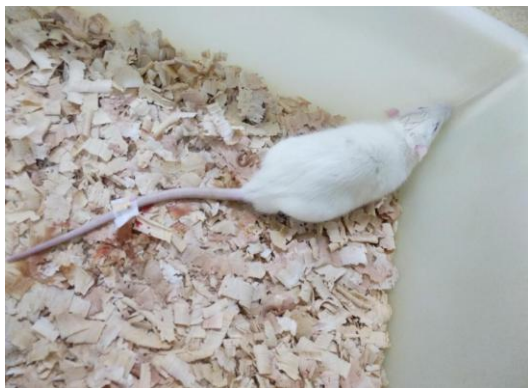

21. The rats regained consciousness and moved freely after operation
